# Supplementary material for: Knowledge and attitude towards Ebola and Marburg virus diseases in Uganda using quantitative and participatory epidemiology techniques
Source: PLoS Negl Trop Dis. 2017 Sep 11;11(9):e0005907. doi: 10.1371/journal.pntd.0005907 (PMC5608436; doi:10.1371/journal.pntd.0005907)
Supplement: S1 Questionnaire — (PDF) [file pntd.0005907.s001.pdf]

### Questionnaire

Date: \_\_\_\_/\_\_\_\_/\_\_\_\_ (D, M, Yr) Sample ID \_\_\_\_\_ Participant classification \_\_\_\_\_

#### Form Completed by:

Name: \_\_\_\_\_ Position: \_\_\_\_\_ District: \_\_\_\_\_

Phone Number/email: \_\_\_\_\_

#### Section 1. Assessment Participant Information

ID Number: \_\_\_\_\_ Name \_\_\_\_\_ Age: \_\_\_\_\_ Gender: ☐ Male ☐ Female.

Village/Town: \_\_\_\_\_ Parish: \_\_\_\_\_ Sub-County: \_\_\_\_\_

District: \_\_\_\_\_ Nationality: \_\_\_\_\_ Marital status ☐ Married ☐ Single ☐ Widowed

GPS Coordinates \_\_\_\_\_

1. **Education level** ☐ None ☐ Primary ☐ Secondary ☐ Post-Secondary ☐ Other specify \_\_\_\_\_
2. **Primary Occupation:** ☐ Farmer ☐ Herdsman ☐ Housewife ☐ Student ☐ Child ☐ Animal Health worker ☐ butcher ☐ Trader ☐ Other, please specify occupation \_\_\_\_\_

#### Knowledge & Attitude Questions

3. Have you heard about Ebola or Marburg Virus Diseases ☐ Yes ☐ No ☐ Unk
4. If yes, from whom: ☐ Health worker ☐ Radio ☐ community leaders ☐ others specify \_\_\_\_\_
5. Do you know the signs and symptoms of Ebola or Marburg virus diseases in humans ☐ Yes ☐ No ☐ Unk
6. If yes how ☐ bleeding ☐ High fever ☐ vomiting ☐ diarrhea ☐ others specify \_\_\_\_\_
7. Do you know the signs and symptoms of Ebola or Marburg virus diseases in animals ☐ Yes ☐ No ☐ Unk
8. If yes how ☐ bleeding ☐ High fever ☐ nasal discharge ☐ diarrhea ☐ abortion ☐ reduced milk production ☐ others specify \_\_\_\_\_
9. Do you know who to contact in case you see a suspect case of Ebola or Marburg diseases? ☐ Yes ☐ No ☐ Unk
10. Do you believe Ebola or Marburg diseases really exists ☐ Yes ☐ No ☐ Unk If no, why \_\_\_\_\_
11. Have you heard of any survivor of Ebola or Marburg diseases ☐ Yes ☐ No ☐ Unk
12. Would you relate/interact with a survivor of Ebola or Marburg diseases ☐ Yes ☐ No ☐ Unk
13. Would you welcome someone back into their community/neighborhood after a neighbor has recovered from Ebola or Marburg diseases ☐ Yes ☐ No ☐ Unk
14. If no, why ☐ fear of contracting disease ☐ fear of stigma from community ☐ others specify \_\_\_\_\_
15. Do you know how Ebola or Marburg disease is transmitted ☐ Yes ☐ No ☐ Unk
16. If yes, how ☐ body contact sick person ☐ through air ☐ through needle pricks ☐ contact with animals ☐ contact with dead person ☐ contact with body fluids of sick person ☐ biting mosquitoes (insects) ☐ others specify \_\_\_\_\_
17. If transmission through animals, which ones ☐ goats ☐ Cattle ☐ Sheep ☐ Poultry ☐ Dogs ☐ monkeys ☐ bats ☐ antelopes ☐ wild pigs ☐ others specify \_\_\_\_\_
18. How do you think you can protect yourself from acquiring Ebola or Marburg disease? ☐ vaccination ☐ avoiding contact with animals ☐ traditional medicine ☐ avoiding sick people ☐ sleeping in a mosquito net ☐ others specify \_\_\_\_\_
19. How do you think Ebola or Marburg diseases can best be healed or treated? ☐ traditional medicine ☐ spiritual healing ☐ Modern medicine ☐ Herbal medicine ☐ others specify \_\_\_\_\_
20. Do you think you are at risk of contracting Ebola or Marburg virus disease ☐ Yes ☐ No ☐ Unk
21. If yes/no, why \_\_\_\_\_

22. Do you know how Ebola or Marburg diseases can be prevented ☐ Yes ☐ No ☐ Unk

23. If yes how \_\_\_\_\_

Thank you for your Time

End of Interview
